# Supplementary material for: The spatial separation of processing and transport functions to the interior and periphery of the Golgi stack
Source: eLife journal article supplement (doi:10.7554/elife.41301), 2018-11-30
Supplement: supp [file elife_poa_e41301_Supplementary_File_3.xlsx]

## Sheet: Sup Table 1
Supplementary Table 1
List of DNA plasmids
Vectors
name	vector (source)	cloning sites	primers	brief method or source reference
pDMyc-neo-N1	pCI-neo (Promega)	SalI/NotI	5’-TCG ACC CCG GGC CGC GGG GCC GGC CAG AAC AAA AAC TCA TCT CAG AAG AGG ATC TGG AAC AAA AAC TCA TCT CAG AAG AGG ATC TGT AAG C-3’ and 5’-GGC CGC TTA CAG ATC CTC TTC TGA GAT GAG TTT TTG TTC CAG ATC CTC TTC TGA GAT GAG TTT TTG TTC TGG CCG GCC CCG CGG CCC GGG G-3’	A pair of oligonucleotides were annealed and ligated into SalI/NotI digested pCI-neo.
pDMyc-Neo				It was previously described (Lu and Hong, 2003).
pGEB				It was previously described (Lu et al., 2001).
pA2E-N1				It was previously described (Ludwig et al., 2016).
pmCherry-C2	pmCherry-C1 (Clontech)	Bgl lI/EcoRl	5'- GAT CAC AGA TCT CGA GCT CAA GCT TCA GCG GCC GCG-3' and 5'-AAT TCG CGG CCG CTG AAG CTT GAG CTC GAG ATC TGT-3'	A pair of oligonucleotides were annealed and ligated into Bgl lI/EcoRl digested pmCherry-C1.
Constructs of trafficking machinery components
name	vector (source)	cloning sites	primers	brief method or source reference
Rab1a-GFP	pEGFP-N1 (Clontech)	XhoI/SalI	5’-GAT GCA CTC GAG ACT CCA GCA TGA ATC CCG AAT ATG-3’ and 5’-GAT GCA GTC GAC TTA CAA GCA GCA ACC TCC ACC-3’	The coding sequence of human Rab1a was PCR amplified from a cDNA clone (GenBank Accession No.: DQ894084.2) using a pair of oligonulceotide primers. The PCR product was digested by XhoI/SalI and ligated into pEGFP-N1 using the same restriction sites.
Furin-GFP	pEGFP-N1 (Clontech)	EcoRI/SalI	5’-CAG ATC TCG AGC TCA AGC TTC GAA TTC GCC ACC ATG GAG CTG AGG CCC TGG-3’ and 5’- GAT CCC GGG CCC GCG GTA CCG TCG ACC CGA GGG CGC TCT GGT CTT TG-3’	The coding sequence of human Furin was PCR amplified from a cDNA clone (GenBank Accession No.: BC012181.1) using a pair of oligonucleotide primers. The PCR product was digested by EcoRI/SalI and ligated into pEGFP-N1 using the same restriction sites.
Fuin-Myc	pDMyc-neo-N1	EcoRI/SalI	5’-CAG ATC TCG AGC TCA AGC TTC GAA TTC GCC ACC ATG GAG CTG AGG CCC TGG-3’ and 5’- GAT CCC GGG CCC GCG GTA CCG TCG ACC CGA GGG CGC TCT GGT CTT TG-3’	The coding sequence of human Furin was PCR amplified from a cDNA clone (GenBank Accession No.: BC012181.1) using a pair of oligonucleotide primers. The PCR product was digested by EcoRI/SalI and ligated into pDMyc-N1 using the same restriction sites.
GFP-GCC185	pDMyc-neo	NheI/NotI	5’-GAA CTG GCT AGC ATG GTG AGC AAG GGC GAG-3’ and 5’-GTA CTG CTC GAG GCA ATA CCG CGG CTT GTA CAG CTC GTC CAT GC-3’	The coding sequence of EGFP was PCR amplified from pEGFP-C1 using a pair of oligonucleotide primers. The PCR product was digested by NheI/XhoI and ligated into pDMyc-neo using the same sites. The intermediate construct was further digested by XhoI/NotI and ligated with a fragment encoding full lenght GCC185, which was released from XhoI/NotI digested pDMyc-GCC185 (a gift from W. Hong lab).
GFP-GCC185-mCherry	GFP-GCC185	XmaI	5'-GAT GAC CCC GGG ACG TGA GCA AGG GCG AGG AG-3' and 5'-GAT GAC CCC GGG AAG TCA GTC GAC TCT TGT ACA GCT CGT CCA T-3'	GFP-GCC185 was digested by XmaI and the digested vector backbone was dephosphorylated by calf intestinal alkaline phosphatase. mCherry was PCR amplifed from pmCherry-N1 (Clontech). The PCR product was digested by XmaI and ligated into the XmaI digested GFP-GCC185 vector backbone described above. The clone with correct mCherry orientation was screened.
GFP-ACBD3	pEGFP-C2 (Clontech)	EcoRI/BamHI		IMAGE clone 5259930 (GeneBank Acc. No.: BC045533) was digested by SpeI, end-blunted by T7 DNA polymerase and digested by EcoRI to release the fragment containing the coding sequence of ACBD3. The fragment was then ligated with pEGFP-C2, which was sequentially digested by BamHI, end-blunted by T7 DNA polymerase, digested by EcoRI and treated by calf intestinal alkaline phosphatase.
GFP-Rab6	pEGFP-C2 (Clontech)	EcoRI/BamHI	5'-GTA CCT GAA TTC ATG TCC ACG GGC GGA GAC TTC G-3', and 5'-CAA GTC GGA TCC TTA GCA GGA ACA GCC TCC TTC AC-3'	The coding sequence of Rab6 was PCR amplified from IMAGE clone: 2124966 (Genbank Acc. No.: AI435940) using a pair of oligonucleotide primers. The PCR product was digested by EcoRI/BamHI and ligated into pEGFP-C2 using the same sites.
mCherry-Golgin84	pmCherry-C1 (Clontech)	SalI/BamHI	5'-GAT GCA GTC GAC TCT TGG TTT GTT GAT CTT G-3' and 5'-GAT GCA GGA TCC TCA TTT GCC ATA TGG TTG-3'	The coding sequence of Golgin84 was PCR amplified from GFP-Golgin84. The PCR product was digested by SalI/BamHI and ligated into the pmCherry-C1 using the same restriction sites.
GFP-GGA1	pEGFP-C2 (Clontech)	EcoRI/BamHI		The coding sequence of human GGA1 was released from GGA1-pGAD-T7 (Lu et al., 2003) by EcoRI/BamHI digestion. The GGA1 fragment was ligated into pEGFP-C2 using the same enzyme sites.
mCherry-GM130	pmCherry-C2	XhoI/BamHI	5'-AGT GAC CTC GAG CAT GTC GGA AGA AAC CCG AC-3' and 5'-GAC CCG AAG CTT CTC TTC C-3'	The coding sequence of GM130's C-terminus was released from GFP-GM130 by BamHI digestion and ligated into pmCherry-C2 using the same restriction site. The clone with correct orientation was screened to obtain an intermediate construct. The N-terminus of GM130 was PCR amplified from GFP-GM130 using a pair of oligonulceotide primers. The PCR product was digested by XhoI/HindIII and ligated into the…
Arf1-GFP				A gift from F. J.M. van Kuppeveld (Wessels et al., 2006).
Arf4-GFP				A gift from F. J.M. van Kuppeveld.
Arf5-GFP				A gift from F. J.M. van Kuppeveld.
GFP-ERGIC53				A gift from H. Hauri (Ben-Tekaya et al., 2005.).
GFP-GM130				A gift from M. De Matties (Marra et al., 2001).
GFP-Golgin84				A gift from M. Lowe (Diao et al., 2003).
GFP-Golgin97				A gift from W. Hong (Lu et al., 2006).
pmScarlet-Giantin-C129				Addgene #85048, a gift from D. Gadella (Bindels et al., 2016).
GPP130-GFP				A gift from A. Linstedt (Linstedt et al., 1997).
GRASP55-GFP				A gift from Y. Zhuang.
GRASP65-GFP				A gift from Y. Zhuang.
DMyc-GCC185				A gift from W. Hong.
Sec23a-mCherry				A gift from W. Hong.
Sec31a-GFP				A gift from W. Hong (Tang et al., 2000).
Vamp4-GFP				A gift from W. Hong (Tran et al., 2007).
Myc-Sec34				A gift from W. Hong (Loh et al., 2002).
Myc-Sec13				A gift from W. Hong (Niu et al., 2012).
Constructs of Golgi enzymes and nucleotide sugar transporter
name	vector (source)	cloning sites	primers	brief method or source reference
MGAT1-AcGFP1	pAcGFP1-N1 (Clontech)	EcoRI/BamHI	5’-AGT GAC GAA TTC ATG CTG AAG AAG CAG TCT G-3’ and 5’-AGT GAC GGA TCC CGA TTC CAG CTA GGA TCA TAG CC-3’	The coding sequence of human MGAT1 was PCR amplified from IMAGE clone (GenBank Accession No.: M61829) using a pair of oligonucleotide primers. The PCR product was digested by EcoRI/BamHI and ligated into pAcGFP1-N1 using the same restriction sites.
MGAT2-AcGFP1	pAcGFP1-N1 (Clontech)	EcoRI/BamHI	5’-AGT GAC GAA TTC ATG AGG TTC CGC ATC TAC-3’ and 5’-AGT GAC GGA TCC CGC TGC AGT CTT CTA TAA CT-3’	The coding sequence of human MGAT2 was PCR amplified from IMAGE clone (GenBank Accession No.: BC006390) using a pair of oligonucleotide primers. The PCR product was digested by EcoRI/BamHI and ligated into pAcGFP1-N1 using the same restriction sites.
MGAT4B-AcGFP1	pAcGFP1-N1 (Clontech)	XhoI/HindIII	5’-AGT GAC CTC GAG ATG AGG CTC CGC AAT GGC-3’ and 5’-AGT GAC AAG CTT GTC GGC CTT TTT CAG GAA G-3’	The coding sequence of human MGAT4B was PCR amplified from IMAGE clone (GenBank Accession No.: AB000624) using a pair of oligonucleotide primers. The PCR product was digested by XhoI/HindIII and ligated into pAcGFP1-N1 using the same restriction sites.
ST6Gal1-AcGFP1	pAcGFP1-N1 (Clontech)	XhoI/BamHI	5’- AGT GAC CTC GAG ATG ATT CAC ACC AAC CTG-3’ and 5’- AGT GAC GGA TCC CGG CAG TGA ATG GTC CGG AAG-3’	The coding sequence of human ST6Gal1 was PCR amplified from a cDNA clone (GenBank Accession No. BC040009) using a pair of oligonucleotide primers. The PCR product was digested by XhoI/BamHI and ligated into the pAcGFP1-N1 using the same restriction sites.
Man1B1-Myc	pDMyc-neo-N1	XhoI/XbaI	5’-AGT GAC CTC GAG GCC ACC ATG GCT GCC TGC GAG GGC AGG AGA AGC-3’ and 5’- AGT GAC TCT AGA GGC AGG GGT CCA GAT AGG CAG-3’	The coding sequence of Man1B1 was PCR amplified from a cDNA clone (GenBank Accession No.: BC006079.1) using a pair of oligonucleotide primers. The PCR product was digested by XhoI/XbaI and ligated into pDMyc-neo-N1 using the same restriction sites.
MGAT1-Myc	pDMyc-neo-N1	XhoI/XbaI	5’-AGT GAC CTC GAG GCC ACC ATG CTG AAG AAG CAG TCT G-3’ and 5’-AGC GAC TCT AGA ATT CCA GCT AGG ATC ATA GCC C-3’	The coding sequence of human MGAT1 was PCR amplified from a cDNA clone (GenBank Accession No. M61829) using a pair of oligonucleotide primers. The PCR product was digested by XhoI/XbaI and ligated into pDMyc-neo-N1 using the same restriction sites.
MGAT2-Myc	pDMyc-neo-N1	EcoRI/XbaI	5’- AGT GAC GAA TTC GCC ACC ATG AGG TTC CGC ATC TAC-3’ and 5’- AGT GAC TCT AGA CTG CAG TCT TCT ATA ACT-3’	The coding sequence of human MGAT2 was PCR amplified from a cDNA clone (GenBank Accession No.: BC006390) using a pair of oligonucleotide primers. The PCR product was digested by EcoRI/XbaI and ligated into pDMyc-neo-N1 using the same restriction sites.
ST6Gal1-Myc	pDMyc-neo-N1	XhoI/XbaI	5’-AGT GAC CTC GAG GCC ACC ATG ATT CAC ACC AAC CTG-3’ and 5’- AGT GAC TCT AGA GCA GTG AAT GGT CCG GAA GC-3’	The coding sequence of human ST6Gal1 was PCR amplified from a cDNA clone (GenBank Accession No. BC040009) using a pair of oligonucleotide primers. The PCR product was digested by XhoI/XbaI and ligated into pDMyc-neo-N1 using the same restriction sites.
β4GalT3-Myc	pDMyc-neo-N1	XhoI/XbaI	5’-AGT GAC TCT AGA GCC ACC ATG TTG CGG AGG CTG CTG GAG-3’ and 5’- AGT GAC GTC GAC GTG TGA ACC TCG GAG GGC TGT G-3’	The coding sequence of human β4GalT3 was PCR amplified from a cDNA clone (GenBank Accession No.: BC009985.2) using a pair of oligonucleotide primers. The PCR product was digested by XhoI/XbaI and ligated into pDMyc-neo-N1 using the same restriction sites.
GalT-mCherry				It was previously described (Tie et al., 2016b).
SLC35C1-Myc				Purchased from Origene (Cat No.: RC200101).
β3GalT6-Myc				Purchased from Origene (Cat No.: MR204731).
β4GalT7-Myc				Purchased from Origene (Cat No.: RC200258).
POMGNT1-Myc				Purchased from Origene (Cat No.: RC200176).
TPST1-GFP				Addgene #66617; a gift from D. Stephens (Spooner et al., 2008).
TPST2-GFP				Addgene #66618; a gift from D. Stephens (Spooner et al., 2008).
Constructs of inducible aggregation reporters
name	vector (source)	cloning sites	primers	brief method or source reference
FM4-moxGFP	pC4S1-FM4-FCS-hGH (a gift from J. Rothman)(Lavieu et al., 2013)	SpeI/ BamHI	5’-GAT GCA ACT AGT GTG TCC AAG GGC GAG GAG-3’ and 5’-GAT GCA GGA TCC TTA CTT GTA CAG CTC GTC-3’	The coding sequence of moxGFP was PCR amplified from moxGFP (Addgene #68070; a gift from E. Snapp; Costantini et al., 2015) using a pair of oligonucleotide primers. The PCR product was digested by SpeI/BamHI and ligated into the vector backbone obtained from SpeI/BamHI digested pC4S1-FM4-FCS-hGH.
GFP-FM4-CD8a				A gift from J. Rothman (Lavieu et al., 2013).
Constructs of RUSH reporters
name	vector (source)	cloning sites	primers	brief method or source reference
li-Strep_ss-SBP-GFP	li-Strep_ss-SBP-EGFP-Ecadherin	XmaI/XbaI	5’-GAT GCA CCC GGG AGG CGC GCC ATG-3’ and 5’-CTC CTC GCC CTT GCT CAC ACC TGC AGG TGG TTC ACG-3’; 5’-CGT GAA CCA CCT GCA GGT GTG AGC AAG GGC GAG GAG-3’ and 5’-GAT GCA TCT AGA TTA CTT GTA CAG CTC GTC CAT-3’	To obtain a fragment encoding ss-SBP-GFP, two intermediate fragments encoding ss-SBP and GFP were PCR amplified from Ii-Strep_ss-SBP-E-Cadherin and pEGFP-C1, respectively, using two pairs of oligonucleotide primers. The two intermediate fragments were combined and subjected to PCR amplification using the first and fourth primer. The resulting ss-SBP-GFP framgent was digested by XmaI/XbaI and liga…
Strep-Ii_VSVG-SBP-Flag	Strep-Ii_VSVG-SBP-EGFP	EcoRI/FseI	5'-GAA AGC TGA ATT CCA TGG ACG AGA A-3' and 5'- GAT GCA GGC CGG CCT TAC TTA TCG TCG TCG TCT TTG TAG TCC TTA TCG TCG TCA TCC TTG TAA TCT GGT TCA CGT TGA CCT TG-3'	To obtain a fragment encoding SBP-Flag, SBP was PCR amplified from Strep-Ii_VSVG-SBP-EGFP using a pair of oligonucleotide primers, where two Flag coding sequence were incorporated in the reverse primer, to obain a PCR product of SBP-Flag. The PCR product was digested by EcoRI/FseI and ligated into Strep-Ii_VSVG-SBP-EGFP using the same restriction sites.
Strep-Ii_VSVG-SBP-EGFP				A gift from F. Perez (Boncompain et al., 2012)
ss-Strep-KDEL_ManII-SBP-GFP				A gift from F. Perez (Boncompain et al., 2012).
ss-Strep-KDEL_ss-SBP-GFP-collagenX				A gift from F. Perez.
ss-Strep-KDEL_ss-SBP-GFP-E-cadherin				A gift from F. Perez (Boncompain et al., 2012).
ss-Strep-KDEL_ss-SBP-mCherry-GPI				A gift from F. Perez (Boncompain et al., 2012).
ss-Strep-KDEL_ss-SBP-GFP-CD8a-Furin				It was previously described (Tie et al., 2016b).
ss-Strep-KDEL_ss-SBP-GFP-CD59				It was previously described (Tie et al., 2016b).
Constructs for APEX2 EM
name	vector (source)	cloning sites	primers	brief method or source reference
GPP130-APEX2-GFP	GPP130-GFP	SacII/BamHI	5’-GAT GCA CCG CGG GCG GAA AGT CTT ACC CAA CTG-3’ and 5’-GAT GCA GGA TCC GGC ATC AGC AAA CCC AAG-3’	The coding sequence of APEX2 was PCR amplified from pA2E-N1 using a pair of oligonucleotide primers. The PCR product was digested by SacII/BamHI and ligated into GPP130-GFP using the same restriction sites.
MGAT2-APEX2-GFP	pA2E-N1	XhoI/HindIII	5’-AGT GAC CTC GAG ATG AGG TTC CGC ATC TAC-3’ and 5’-AGT GAC AAG CTT CTG CAG TCT TCT ATA ACT TTT AC-3’	The coding sequence of human MGAT2 was PCR amplified from IMAGE clone (GenBank Accession No.: BC006390) using a pair of oligonucleotide primers. The PCR product was digested by XhoI/HindIII and ligated into pA2E-N1 using the same restriction sites.
Constructs for Giantin antibody production
name	vector (source)	cloning sites	primers	brief method or source reference
His-Giantin(3131-3201)	pET30a (Novagen)	BamHI/ XhoI	5’-GAT GCA GGA TCC GAA CCG CAG CAA AGC TTT TC-3’ and 5’-GAT GCA CTC GAG TCT CCT GAG TGC CAC AGG AG-3’	The coding sequence of 3131-3201 aa of human Giantin (NP_004478.3) was PCR amplified from pmScarlet-Giantin-C129 using a pair of oligonucleotide primers. The PCR product was digested by BamHI/ XhoI and ligated into pET30a using the same restriction sites.
GST-Giantin(3131-3235)	pGEB	EcoRI/ BamHI	5’- GAT GCA GAA TTC GAA CCG CAG CAA AGC TTT T C-3’ and 5’-GAT GCA GGA TCC TCA TCG GGT CCG TGA ATG ACA G-3’	The coding sequence of 3131-3235 aa of human Giantin (NP_004478.3) was PCR amplified from pmScarlet-Giantin-C129 using a pair of oligonucleotide primers. The PCR product was digested by EcoRI/ BamHI and ligated into pGEB using the same sites.
Other contructs
name	vector (source)	cloning sites	primers	brief method or source reference
Streptavidin-His				Addgene #20860; a gift from T. Alice (Howarth e al., 2006).
GFP-Nup133-mut				It was previously described (Tie et al., 2016a).
shNup133-1				It was previously described (Tie et al., 2016a).
Supplementary References
Ben-Tekaya, H., Miura, K., Pepperkok, R., & Hauri, H. P. (2005). Live imaging of bidirectional traffic from the ERGIC. Journal of cell science, 118(2), 357-367.
Bindels, D. S., Haarbosch, L., Van Weeren, L., Postma, M., Wiese, K. E., Mastop, M., ... & Gadella Jr, T. W. (2017). mScarlet: a bright monomeric red fluorescent protein for cellular imaging. nature methods, 14(1), 53.
Boncompain, G., Divoux, S., Gareil, N., De Forges, H., Lescure, A., Latreche, L., ... & Perez, F. (2012). Synchronization of secretory protein traffic in populations of cells. Nature methods, 9(5), 493.
Costantini, L. M., Baloban, M., Markwardt, M. L., Rizzo, M., Guo, F., Verkhusha, V. V., & Snapp, E. L. (2015). A palette of fluorescent proteins optimized for diverse cellular environments. Nature communications, 6, 7670.
Diao, A., Rahman, D., Pappin, D. J., Lucocq, J., & Lowe, M. (2003). The coiled-coil membrane protein golgin-84 is a novel rab effector required for Golgi ribbon formation. The Journal of cell biology, 160(2), 201-212.
Howarth, M., Chinnapen, D. J., Gerrow, K., Dorrestein, P. C., Grandy, M. R., Kelleher, N. L., ... & Ting, A. Y. (2006). A monovalent streptavidin with a single femtomolar biotin binding site. Nature methods, 3(4), 267.
Lavieu, G., Zheng, H., & Rothman, J. E. (2013). Stapled Golgi cisternae remain in place as cargo passes through the stack. Elife, 2, e00558.
Linstedt, A. D., Mehta, A., Suhan, J., Reggio, H., & Hauri, H. P. (1997). Sequence and overexpression of GPP130/GIMPc: evidence for saturable pH-sensitive targeting of a type II early Golgi membrane protein. Molecular biology of the cell, 8(6), 1073-1087.
Loh, E., & Hong, W. (2002). Sec34 is implicated in traffic from the endoplasmic reticulum to the Golgi and exists in a complex with GTC-90 and ldlBp. Journal of Biological Chemistry, 277(24), 21955-21961.
Lu L, Horstmann H, Ng C, Hong W (2001). Regulation of Golgi structure and function by ARF-like protein 1 (Arl1). J Cell Sci 114, 4543-4555.
Lu L, Tai G, Wu M, Song H, Hong W (2006). Multilayer interactions determine the Golgi localization of GRIP golgins. Traffic 7, 1399-1407.
Lu, L., & Hong, W. (2003). Interaction of Arl1-GTP with GRIP Domains Recruits Autoantigens Golgin-97 and Golgin-245/p230 onto the Golgi. Molecular Biology of the Cell, 14(9), 3767–3781. http://doi.org/10.1091/mbc.E03-01-0864
Ludwig, A., Nichols, B. J., & Sandin, S. (2016). Architecture of the caveolar coat complex. J Cell Sci, jcs-191262.
Marra, P., Maffucci, T., Daniele, T., Di Tullio, G., Ikehara, Y., Chan, E. K., ... & De Matteis, M. A. (2001). The GM130 and GRASP65 Golgi proteins cycle through and define a subdomain of the intermediate compartment. Nature cell biology, 3(12), 1101.
Niu, X., Gao, C., Lo, L. J., Luo, Y., Meng, C., Hong, J., ... & Peng, J. (2012). Sec13 safeguards the integrity of the endoplasmic reticulum and organogenesis of the digestive system in zebrafish. Developmental biology, 367(2), 197-207.
Spooner, R. A., Watson, P., Smith, D. C., Boal, F., Amessou, M., Johannes, L., ... & Roberts, L. M. (2008). The secretion inhibitor Exo2 perturbs trafficking of Shiga toxin between endosomes and the trans-Golgi network. Biochemical Journal, 414(3), 471-484.
Tang, B. L., Zhang, T., Low, D. Y., Wong, E. T., Horstmann, H., & Hong, W. (2000). Mammalian homologues of yeast sec31p An ubiquitously expressed form is localized to endoplasmic reticulum (ER) exit sites and is essential for ER-Golgi transport. Journal of Biological Chemistry, 275(18), 13597-13604.
Tie, H. C., Madugula, V., & Lu, L. (2016a). The development of a single molecule fluorescence standard and its application in estimating the stoichiometry of the nuclear pore complex. Biochemical and biophysical research communications, 478(4), 1694-1699.
Tie, H. C., Mahajan, D., Chen, B., Cheng, L., VanDongen, A. M., & Lu, L. (2016b). A novel imaging method for quantitative Golgi localization reveals differential intra-Golgi trafficking of secretory cargoes. Molecular biology of the cell, 27(5), 848-861.
Tran, T. H. T., Zeng, Q., & Hong, W. (2007). VAMP4 cycles from the cell surface to the trans-Golgi network via sorting and recycling endosomes. Journal of cell science, 120(6), 1028-1041.
Wessels, E., Duijsings, D., Niu, T. K., Neumann, S., Oorschot, V. M., de Lange, F., ... & Melchers, W. J. (2006). A viral protein that blocks Arf1-mediated COP-I assembly by inhibiting the guanine nucleotide exchange factor GBF1. Developmental cell, 11(2), 191-201.
